# Supplementary material for: Synthesis of carbon dot-ZnO-based nanomaterials for antibacterial application
Source: Royal Society of Chemistry journal article supplement (doi:10.1039/d0nj05741j), 2021-01-01
Supplement: d0nj05741j1.pdf [file d0nj05741j1.pdf]

1 Synthesis of Carbon Dot-ZnO-Based Nanomaterials for  
2 Antibacterial Application

3 *Xuwei Gao,<sup>a</sup> Xiaotong Ma,<sup>a</sup> Xinyu Han,<sup>a</sup> Xinrui Wang,<sup>a,\*</sup> Shujing Li,<sup>a</sup>*

4 *Jian Yao,<sup>b</sup> Wenying Shi<sup>b</sup>*

5

6 <sup>a</sup> College of chemistry and materials engineering /Key Laboratory of Cosmetic,  
7 China National Light Industry, Beijing Technology and Business University,

8 Beijing 100048, China

9 <sup>b</sup> State Key Laboratory of Chemical Resource Engineering, Beijing University

10 of Chemical Technology, Beijing 100029, China

11

12 *\*E-mail: wangxinrui@th.btbu.edu.cn*

13

14

15

16

17

18

19

20

21

22

23

24

25

26

27

28

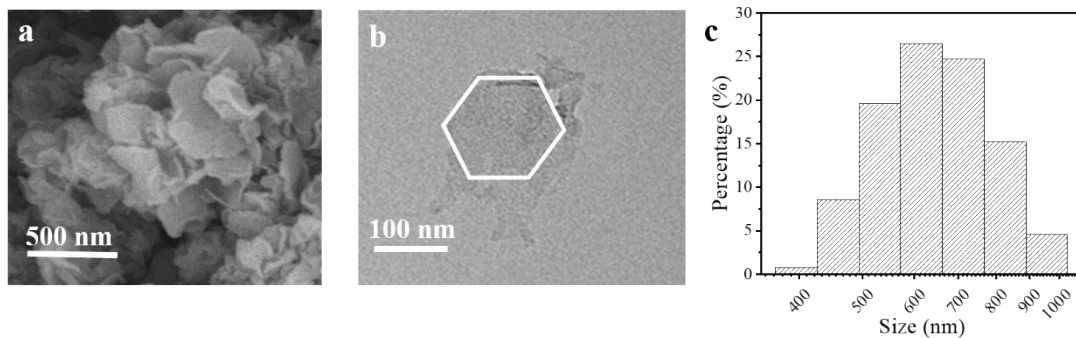

1  
2 Figure S1 SEM image (a), TEM image (b) and Size distribution (c) of ZnAl -  
3 LDH.  
4

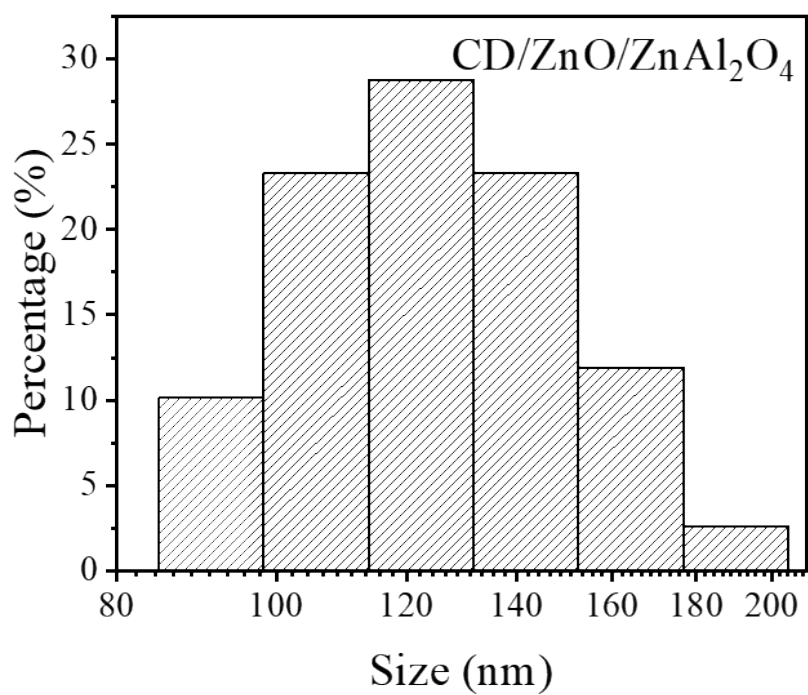

1  
2  
3  
4

Figure S2 Size distribution of CD/ZnO/ZnAl<sub>2</sub>O<sub>4</sub>.

1

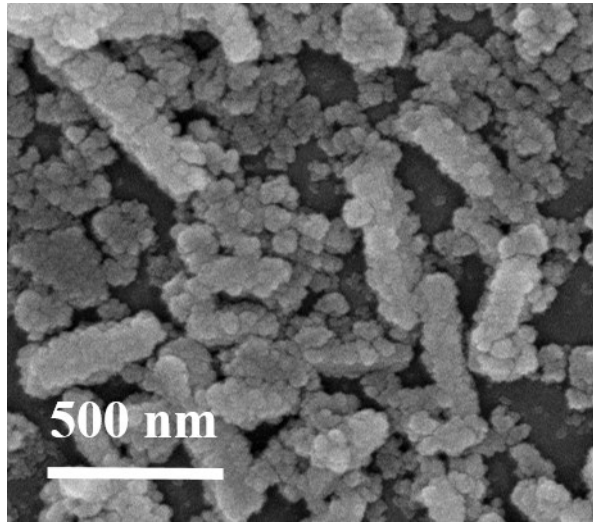

2

3

4

Figure S3 SEM image of ZnO/ZnAl<sub>2</sub>O<sub>4</sub>.

1

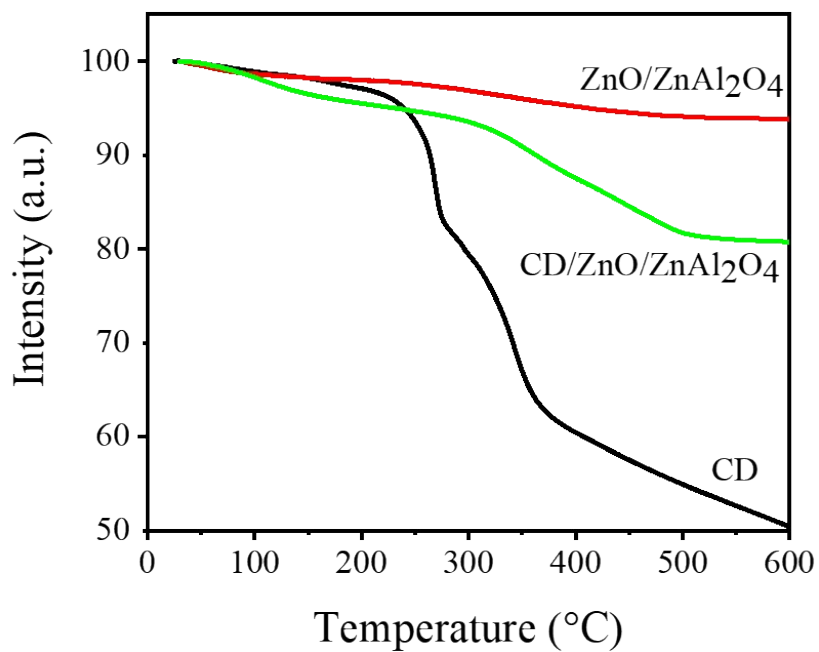

2

3 Figure S4 TGA curves of CD, ZnO/ZnAl<sub>2</sub>O<sub>4</sub> and CD/ ZnO/ZnAl<sub>2</sub>O<sub>4</sub>  
4 nanocomposites.

5

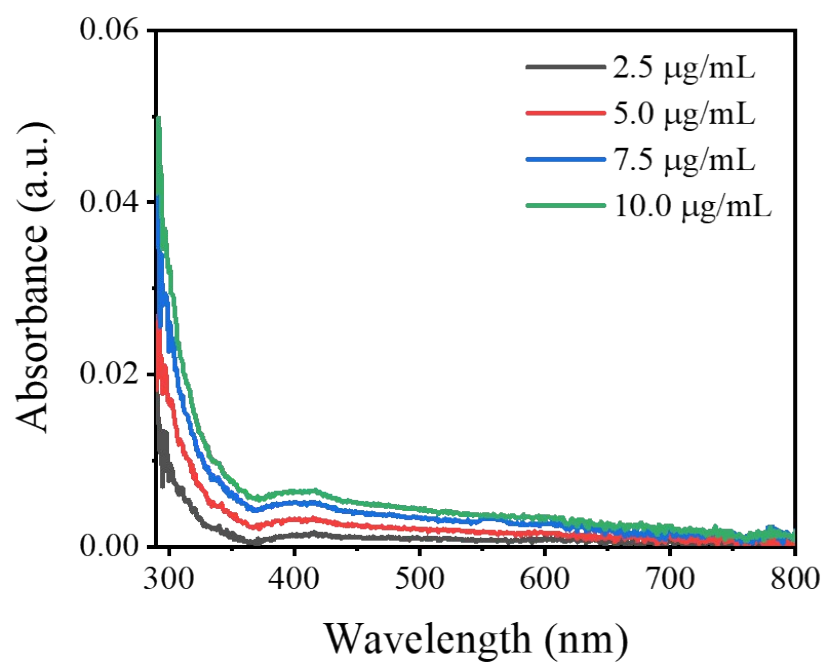

1

2 Figure S5 The UV-vis absorption of CD/ZnO/ZnAl<sub>2</sub>O<sub>4</sub> in nutrient broth.

3

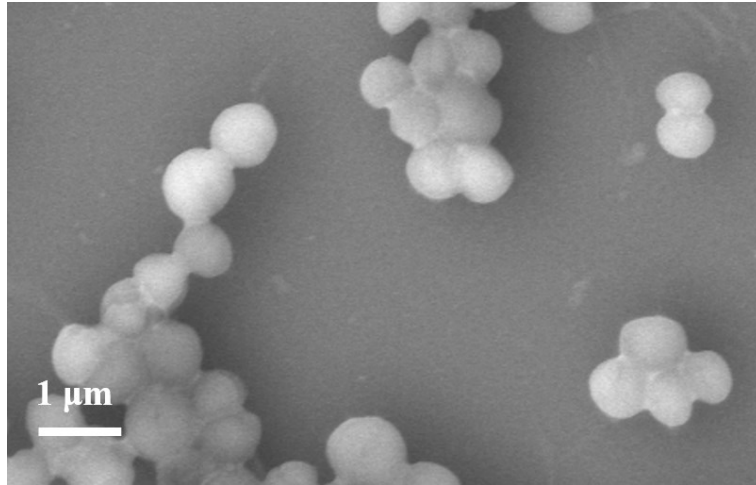

1  
2  
3  
4

Figure S6 SEM image of agglomerating *S. aureus* under normal conditions.

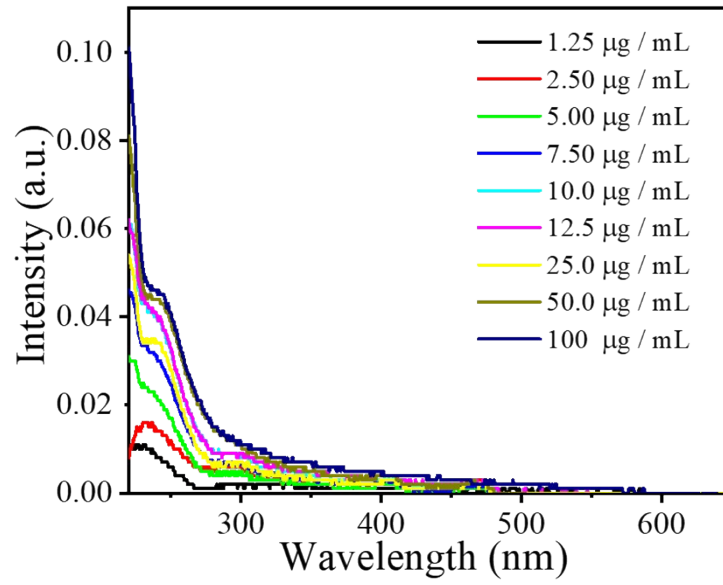

1

2

Figure S7 The UV-vis absorption of CD/ZnO/ZnAl<sub>2</sub>O<sub>4</sub> in PBS.
